# Supplementary material for: Inhibition of DNMT1 methyltransferase activity via glucose-regulated O-GlcNAcylation alters the epigenome
Source: eLife journal article supplement (doi:10.7554/elife.85595), 2023-07-20

Figure 2—figure supplement 1

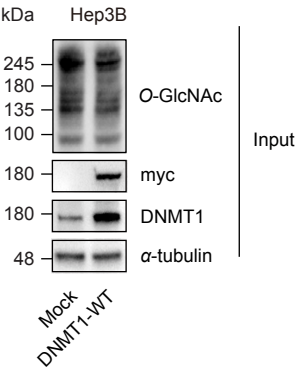

Input: O-GlcNAc

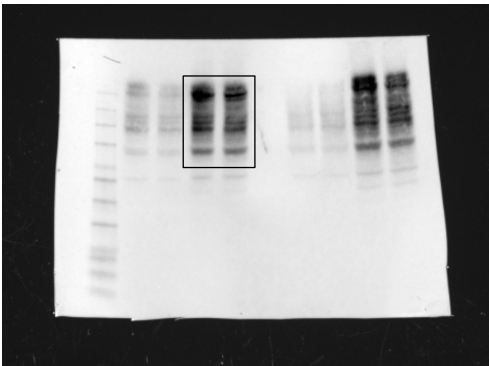

Input: myc

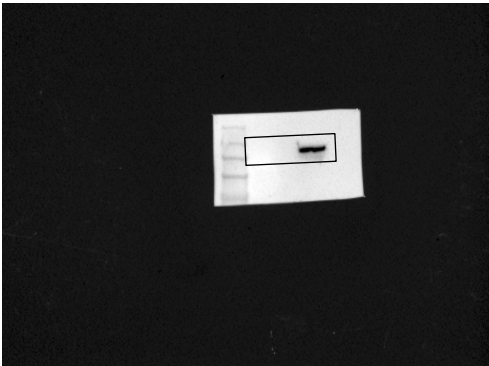

Input: Dnmt1

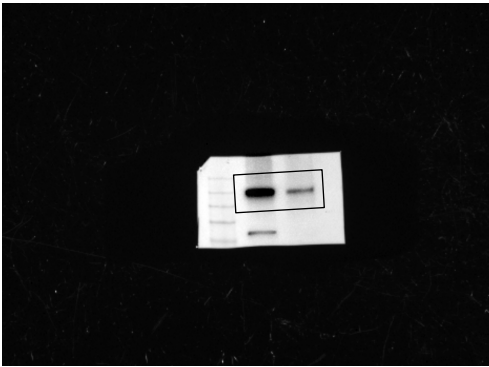

Input:  $\alpha$ -Tubulin

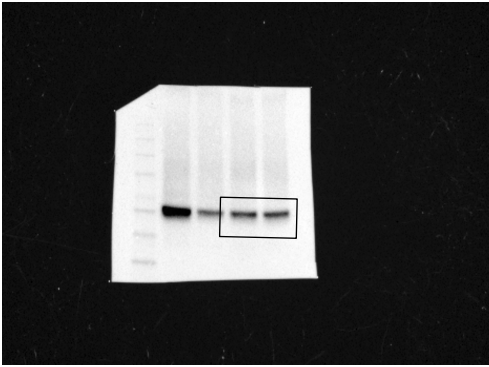

Figure 2—figure supplement 1

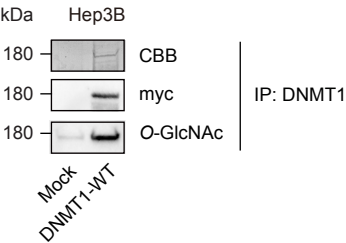

CBB

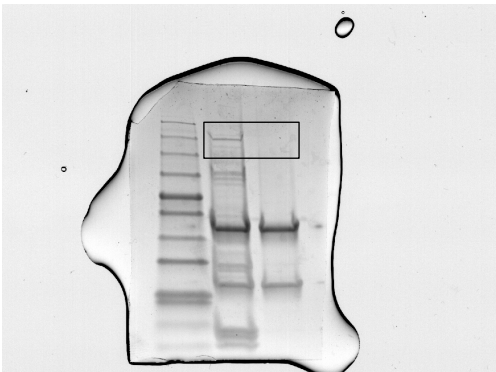

IP: myc

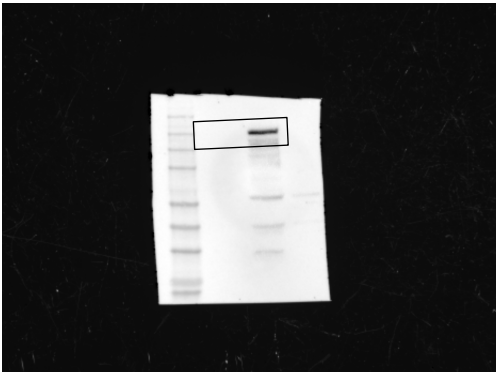

IP: O-GlcNAc

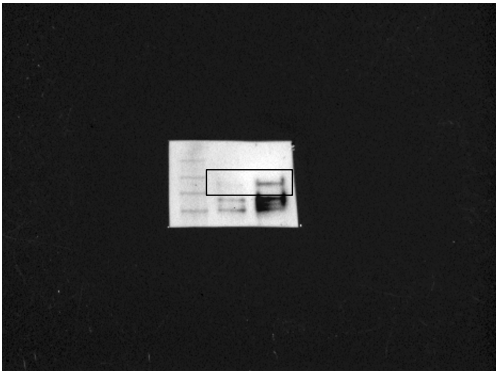

Supplement: fig2-figsupp1-data1 [file elife-85595-fig2-figsupp1-data1-v2.zip]
