# Supplementary material for: Inhibition of DNMT1 methyltransferase activity via glucose-regulated O-GlcNAcylation alters the epigenome
Source: eLife journal article supplement (doi:10.7554/elife.85595), 2023-07-20

Figure 5B\_γH2A.X

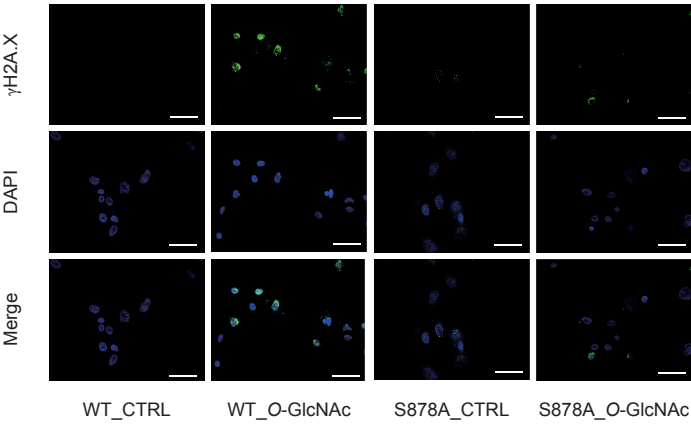

WT\_CTRL

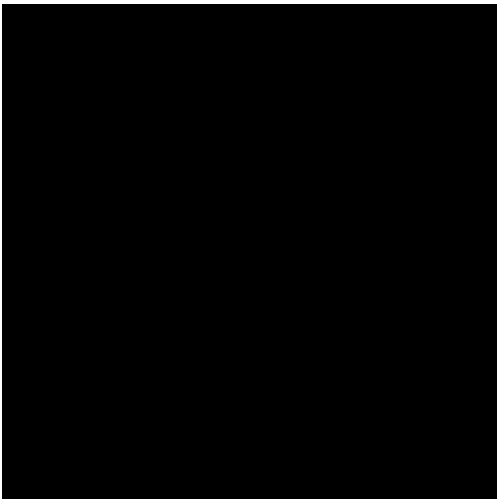

WT\_O-GlcNAc

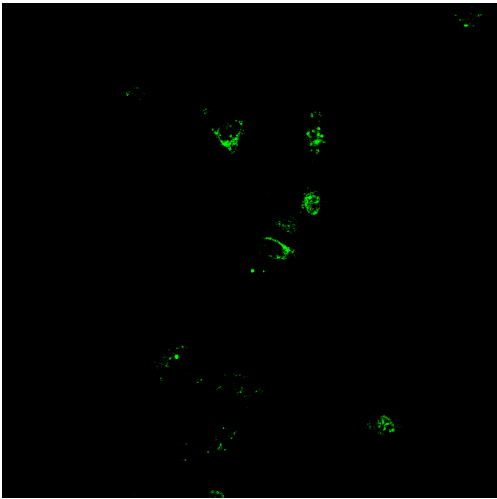

S878A\_CTRL

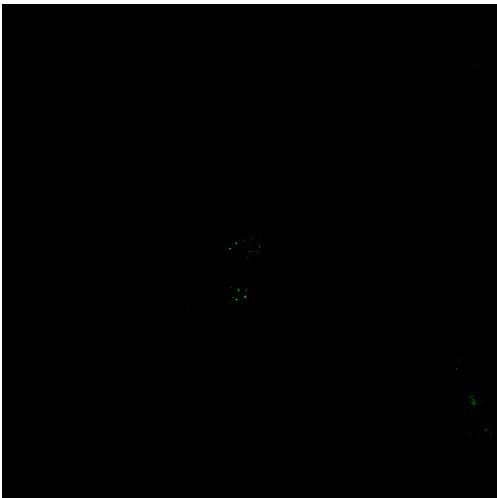

S878A\_O-GlcNAc

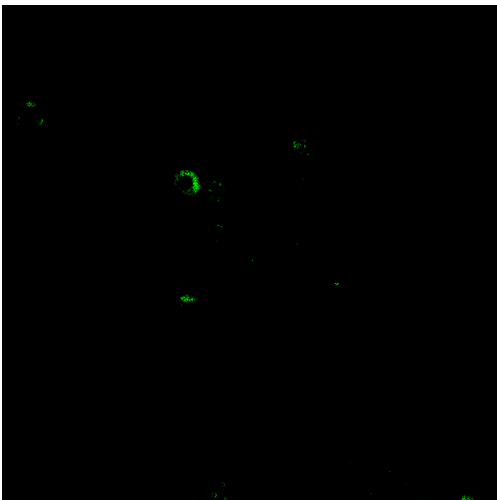

Figure 5B\_DAPI

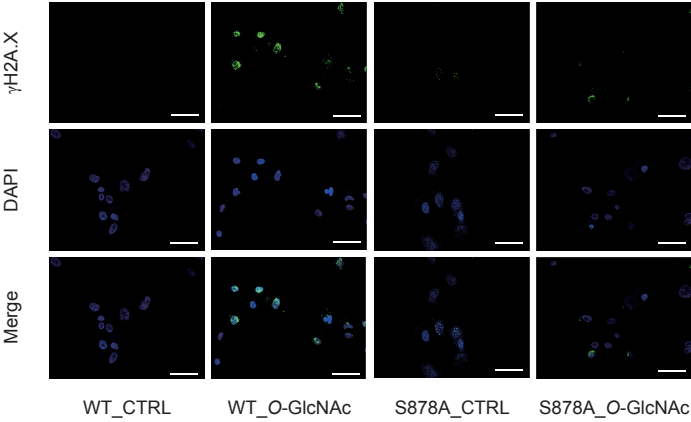

WT\_CTRL

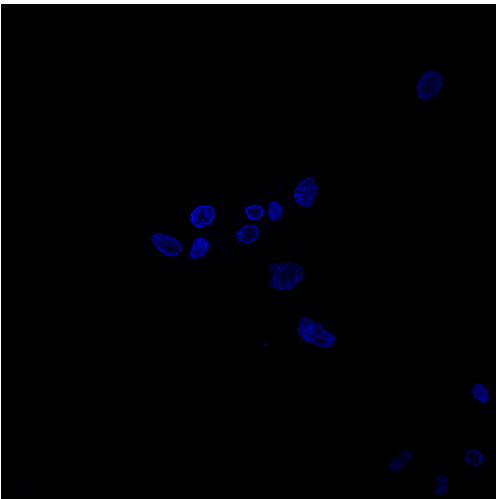

WT\_O-GlcNAc

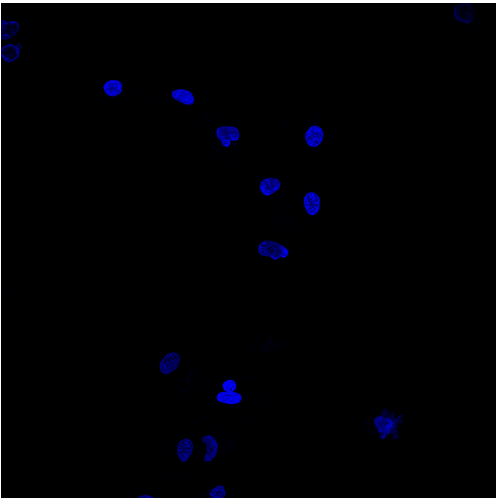

S878A\_CTRL

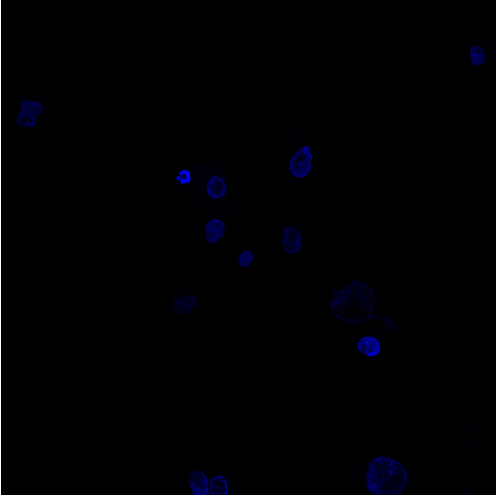

S878A\_O-GlcNAc

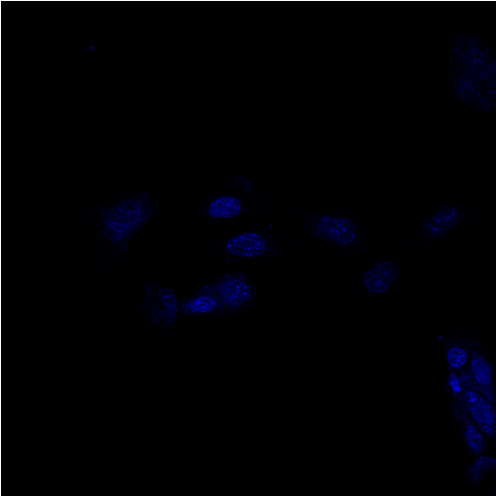

Figure 5B\_merge



WT\_CTRL

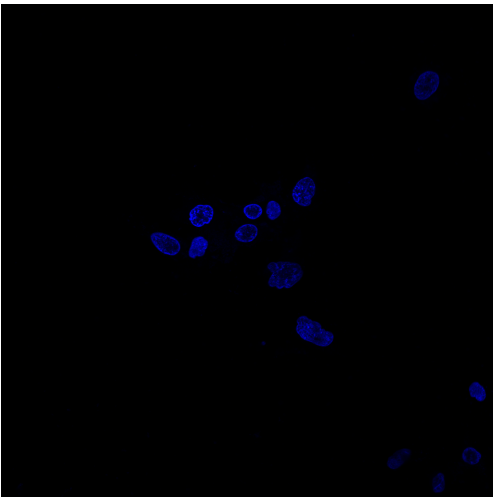

WT\_O-GlcNAc

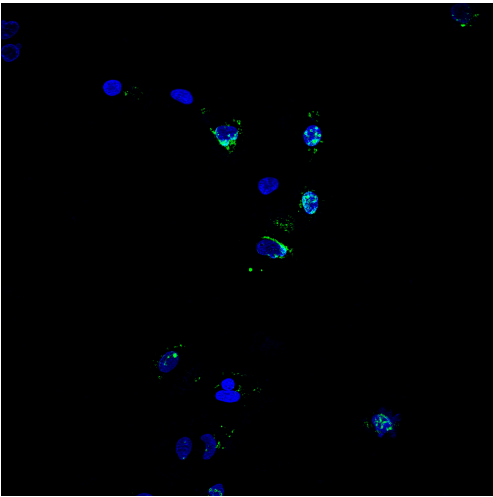

S878A\_CTRL

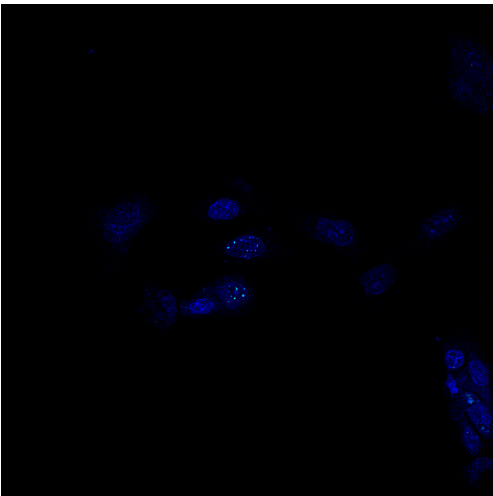

S878A\_O-GlcNAc

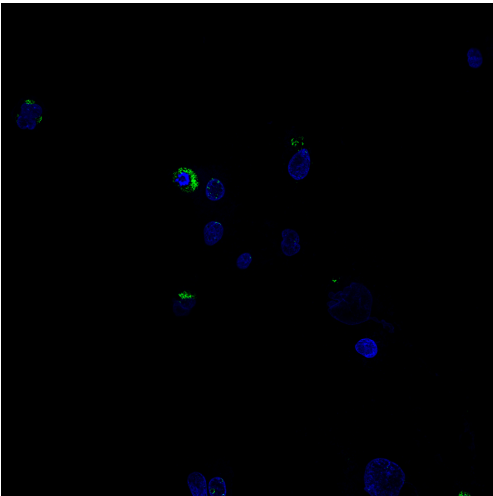

Supplement: fig5-data1 [file elife-85595-fig5-data1-v2.zip]
