# Supplementary figures and images for: Inhibition of DNMT1 methyltransferase activity via glucose-regulated O-GlcNAcylation alters the epigenome
Source: eLife journal article supplement (doi:10.7554/elife.85595), 2023-07-20

Figure 1B

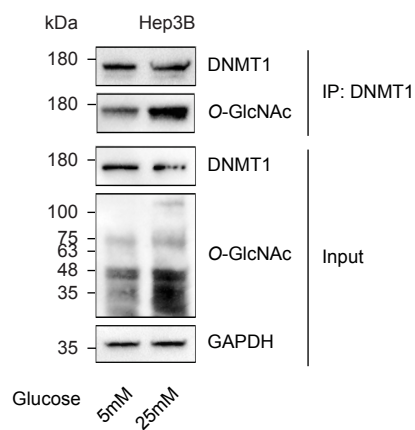

IP: DNMT1

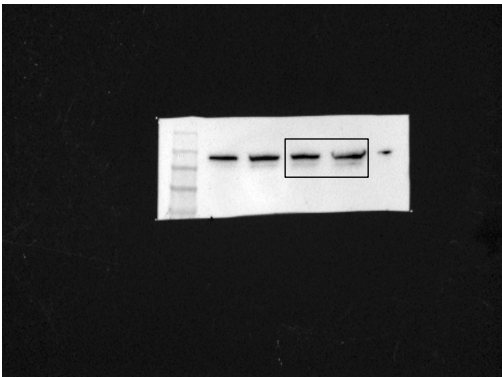

IP: O-GlcNAc

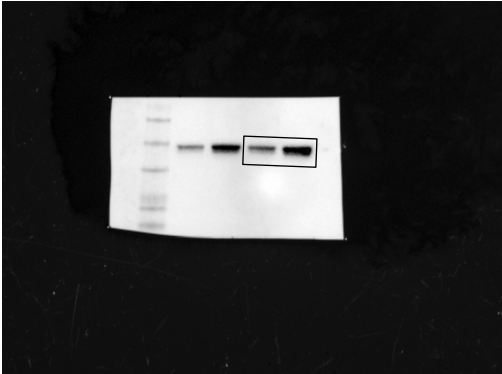

Input: DNMT1

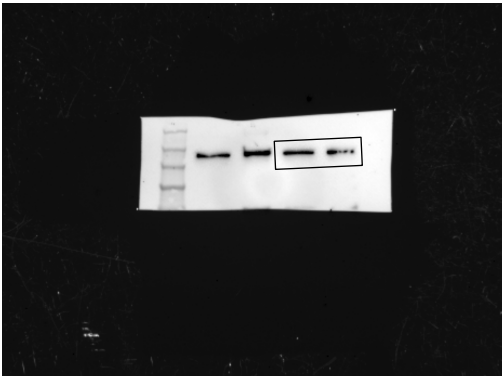

Input: O-GlcNAc

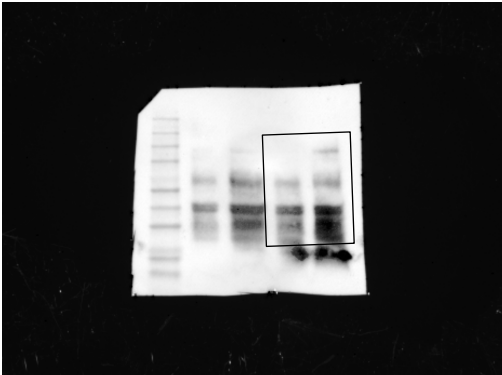

Input: GAPDH

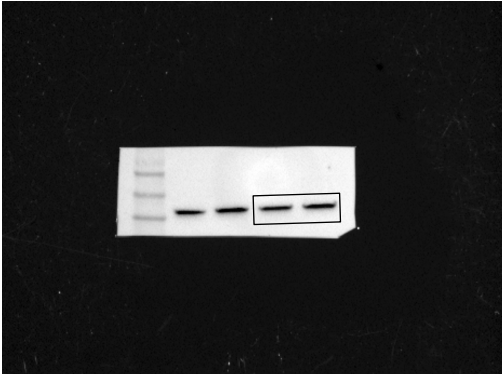

Supplement: fig1-data1 [file elife-85595-fig1-data1-v2.zip]

Figure 1C

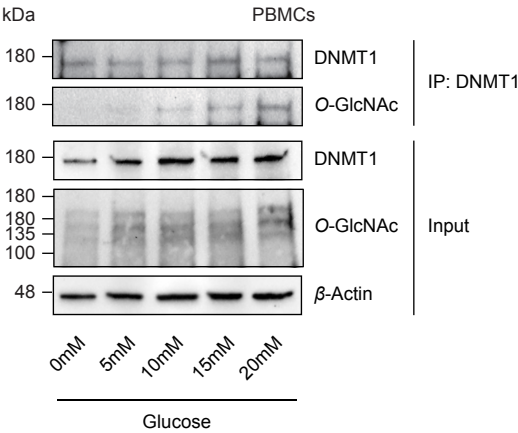

IP: DNMT1

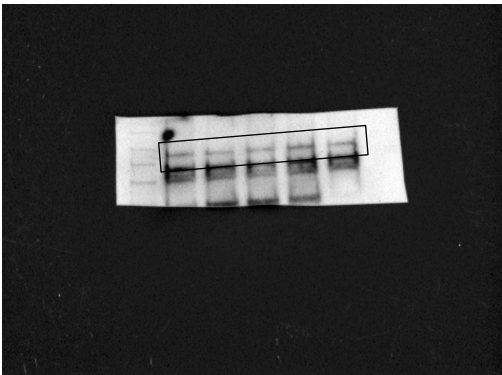

IP: O-GlcNAc

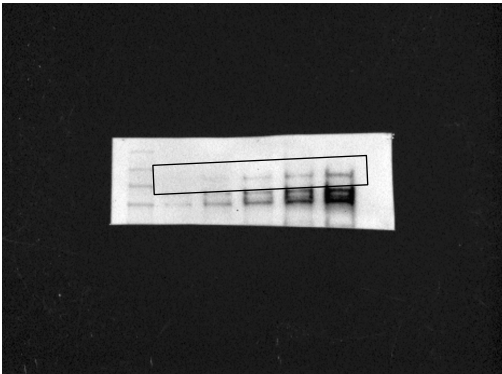

Input: DNMT1

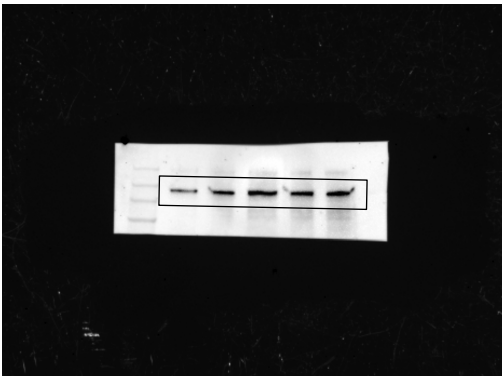

Input: O-GlcNAc

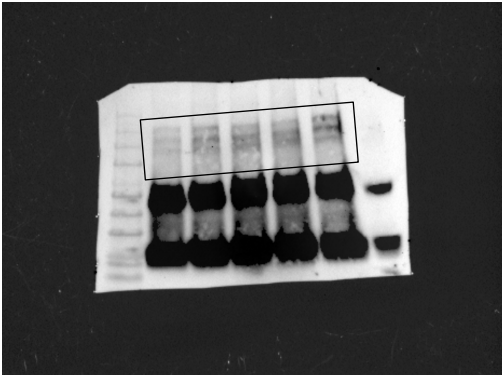

Input:  $\beta$ -Actin

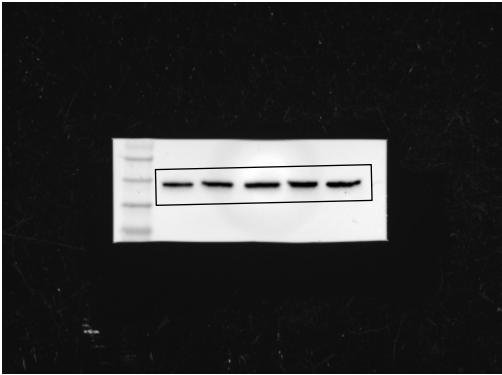

Supplement: fig1-data1 [file elife-85595-fig1-data1-v2.zip]

Figure 1D

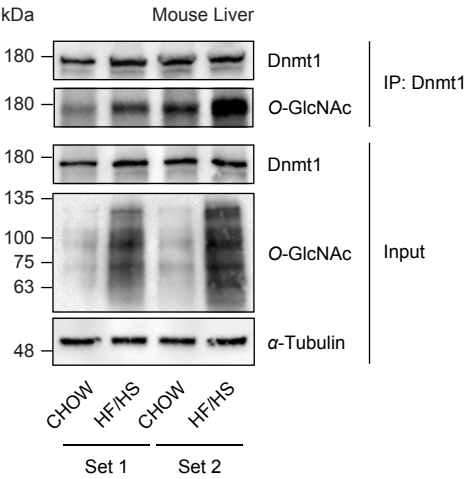

IP: Dnmt1

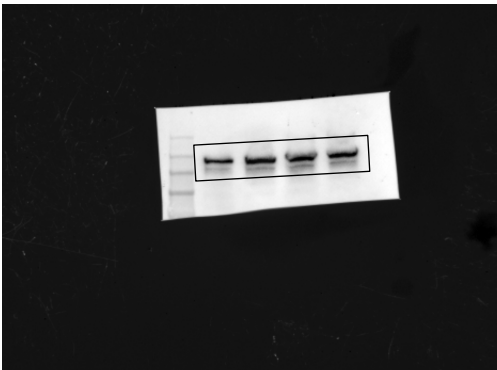

IP: O-GlcNAc

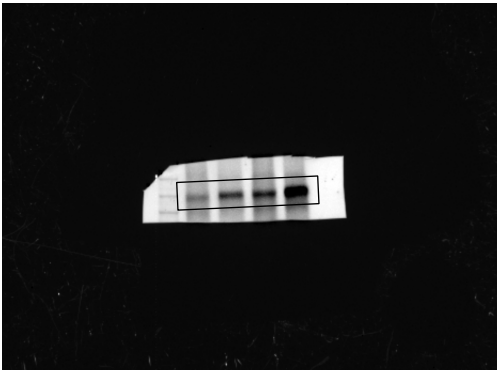

Input: Dnmt1

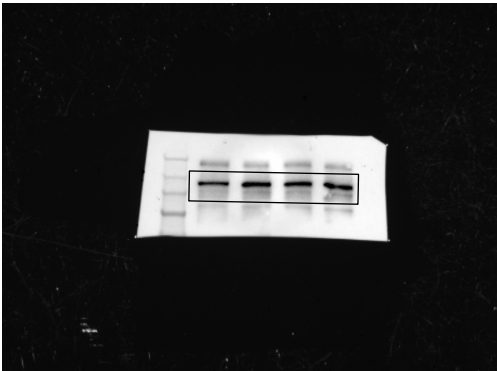

Input: O-GlcNAc

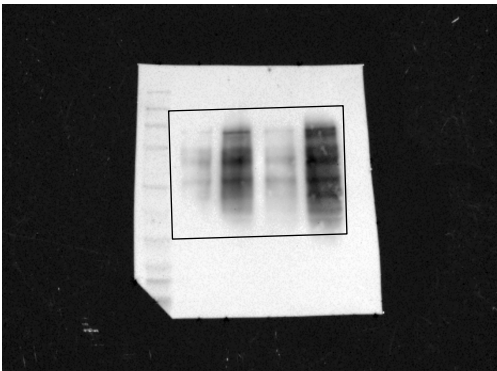

Input:  $\alpha$ -Tubulin

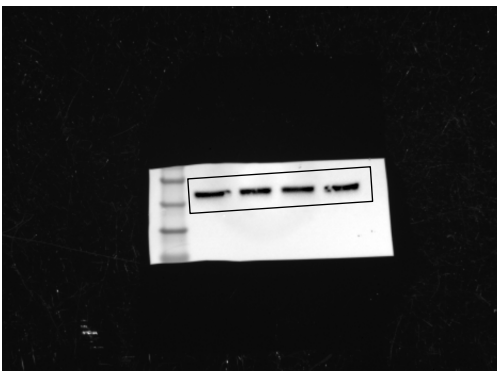

Supplement: fig1-data1 [file elife-85595-fig1-data1-v2.zip]

Figure 1A

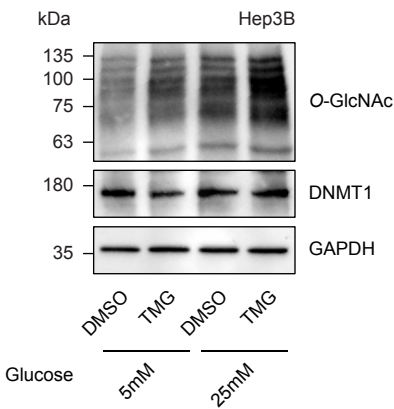

O-GlcNAc

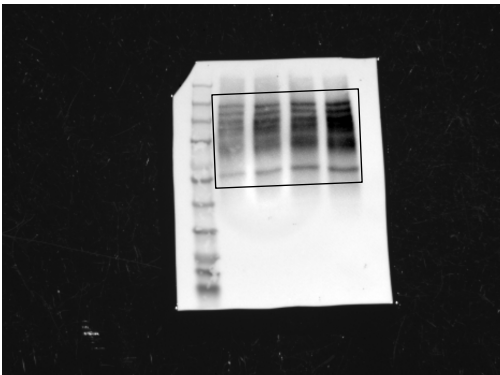

DNMT1

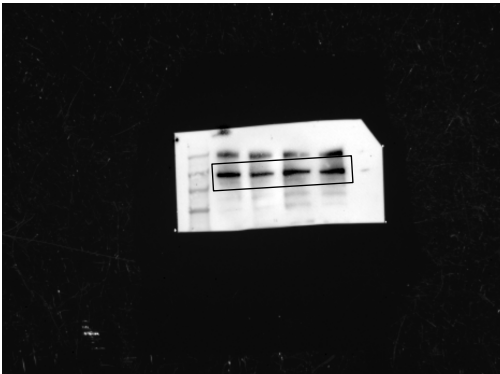

GAPDH

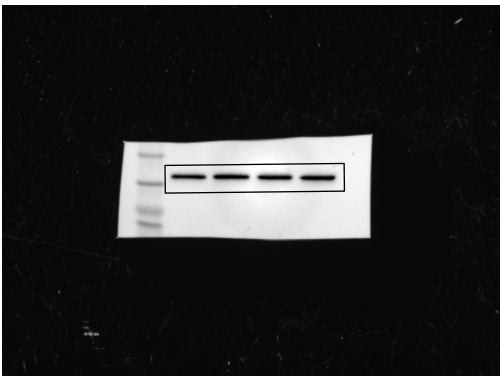

Supplement: fig1-data1 [file elife-85595-fig1-data1-v2.zip]

Figure 1—figure supplement 1

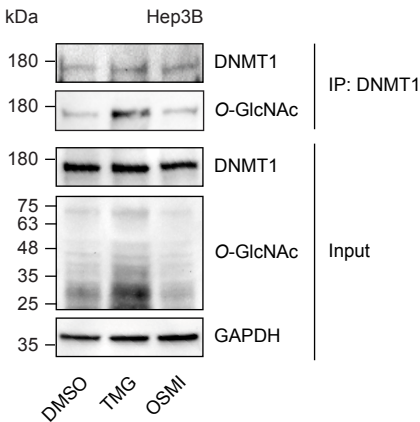

IP: DNMT1

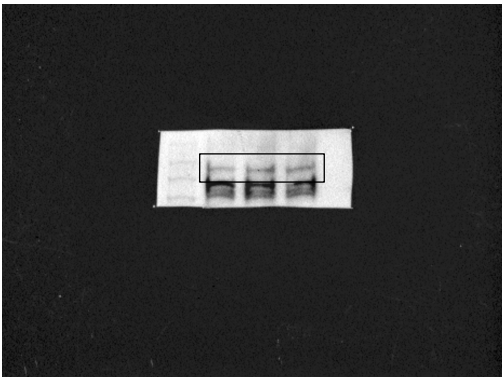

IP: O-GlcNAc

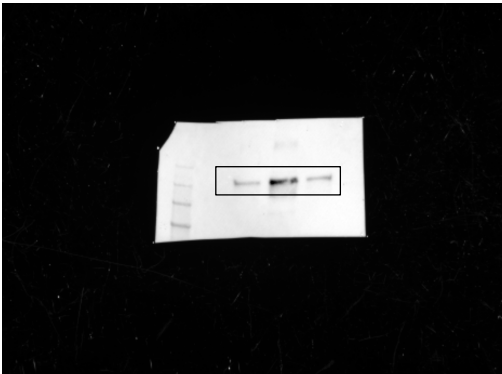

Input: DNMT1

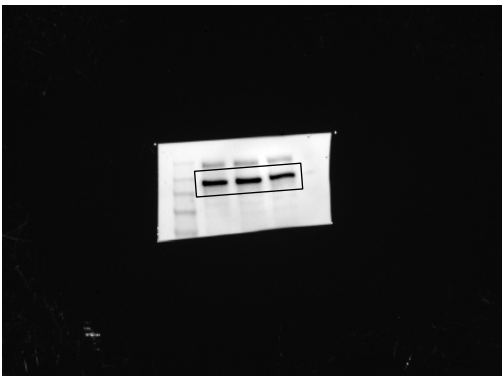

Input: O-GlcNAc

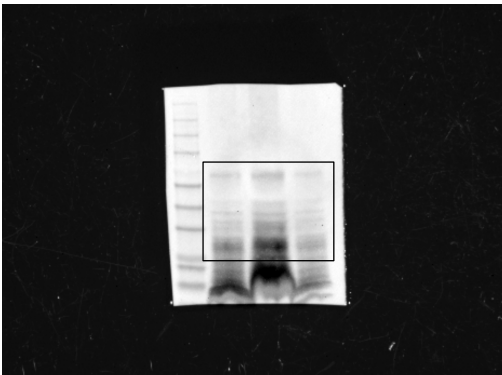

Input: GAPDH

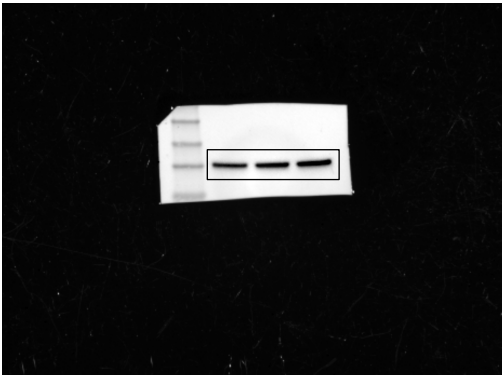

Supplement: fig1-figsupp1-data1 [file elife-85595-fig1-figsupp1-data1-v2.zip]

Figure 1—figure supplement 2A

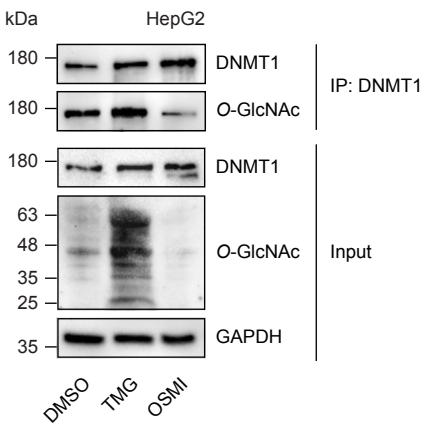

IP: DNMT1

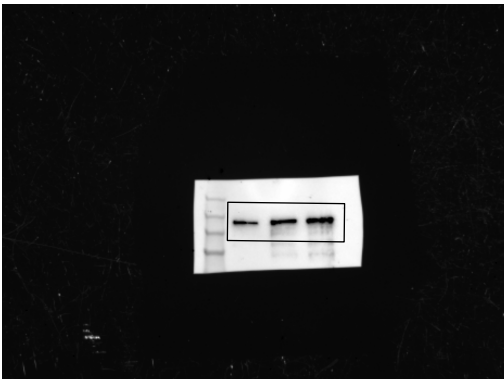

IP: O-GlcNAc

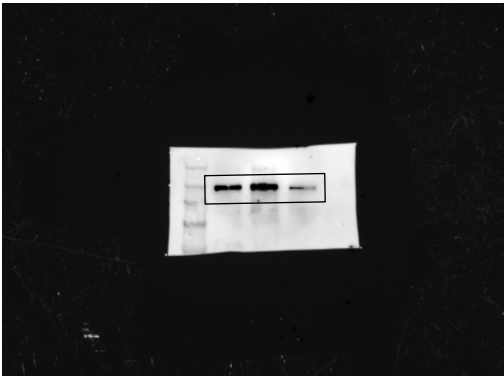

Input: DNMT1

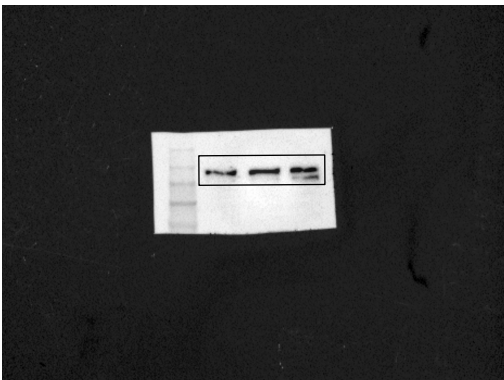

Input: O-GlcNAc

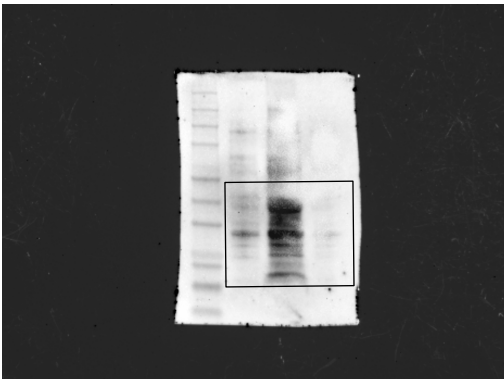

Input: GAPDH

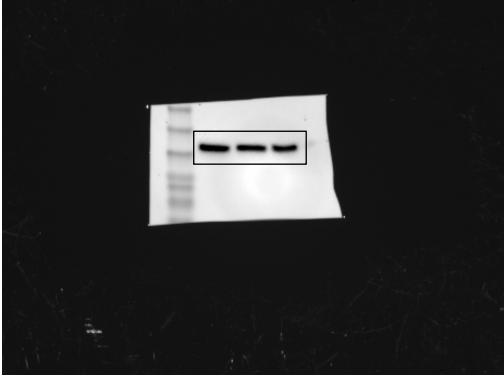

Supplement: fig1-figsupp2-data1 [file elife-85595-fig1-figsupp2-data1-v2.zip]

Figure 1—figure supplement 2B

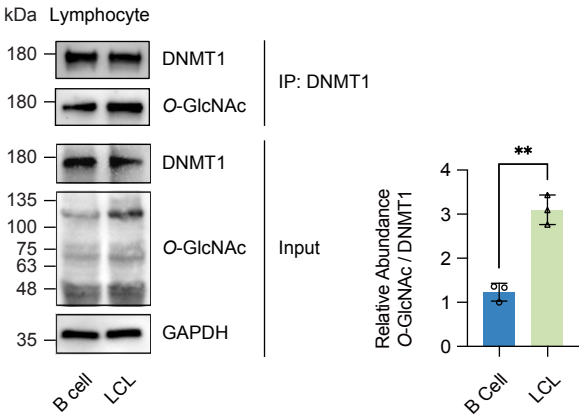

IP: DNMT1

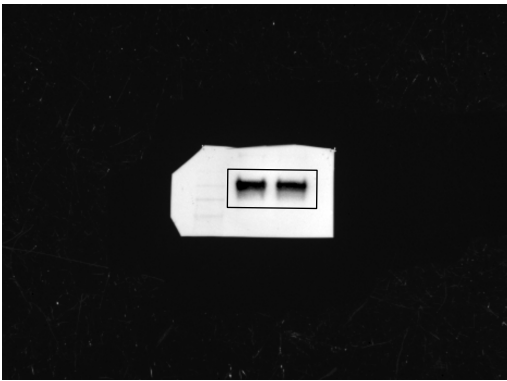

IP: O-GlcNAc

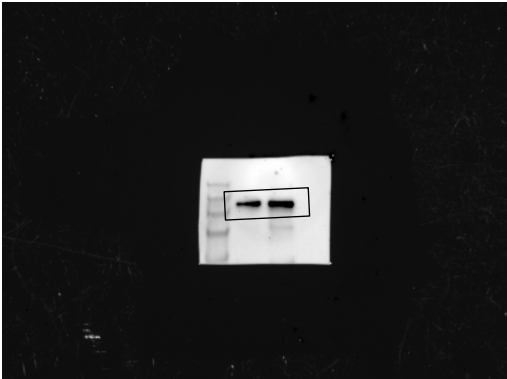

Input: DNMT1

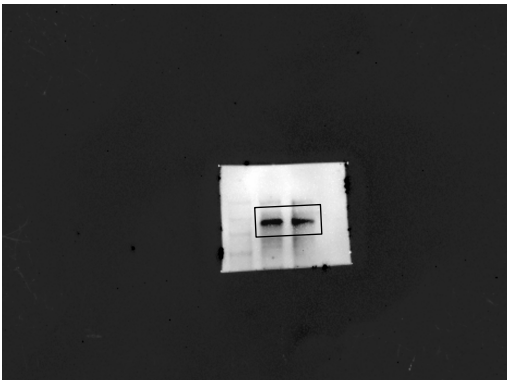

Input: O-GlcNAc

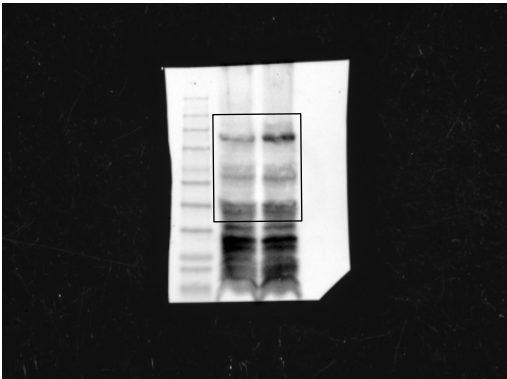

Input: GAPDH

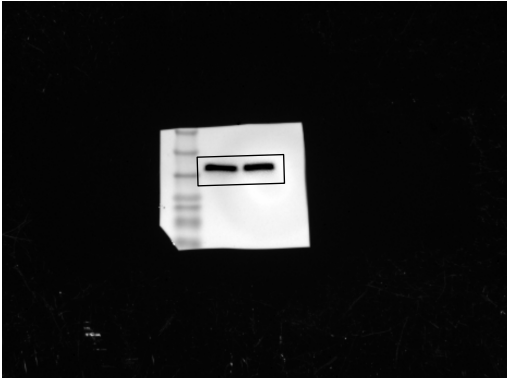

Supplement: fig1-figsupp2-data1 [file elife-85595-fig1-figsupp2-data1-v2.zip]

Figure 1—figure supplement 3B

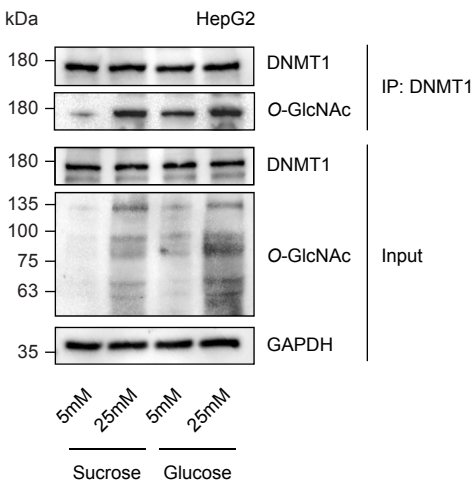

IP: DNMT1

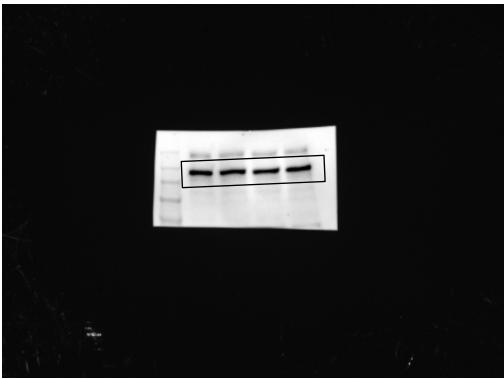

IP: O-GlcNAc

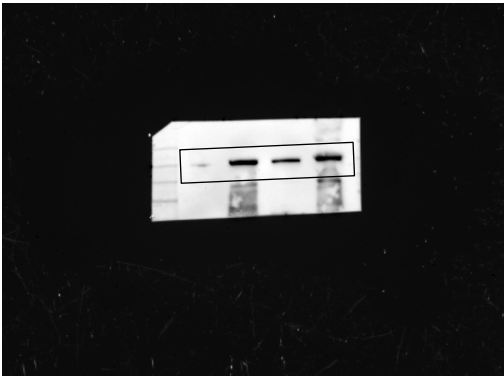

Input: DNMT1

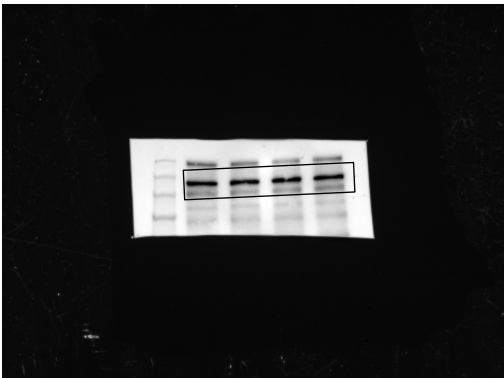

Input: O-GlcNAc

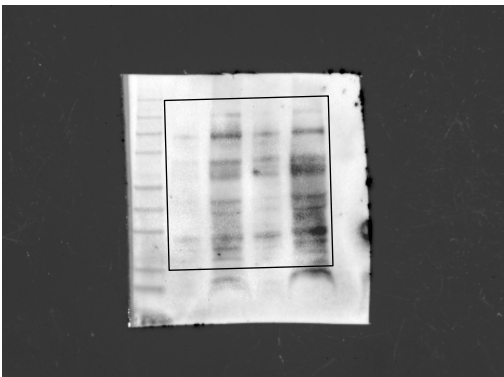

Input: GAPDH

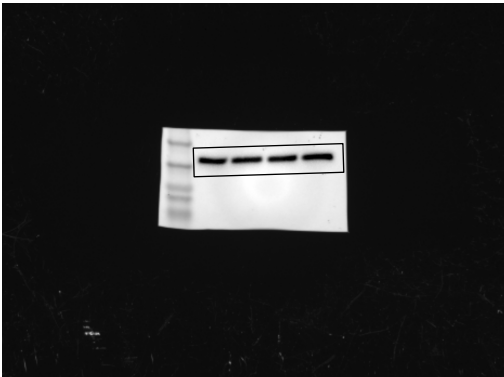

Supplement: fig1-figsupp3-data1 [file elife-85595-fig1-figsupp3-data1-v2.zip]

Figure 1—figure supplement 3A

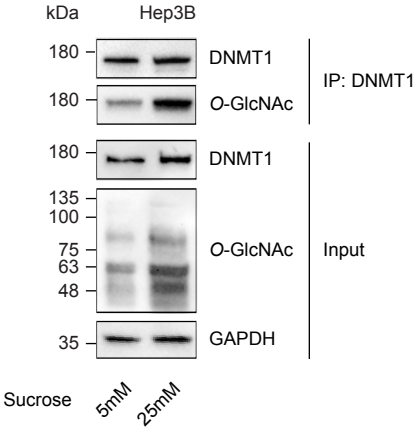

IP: DNMT1

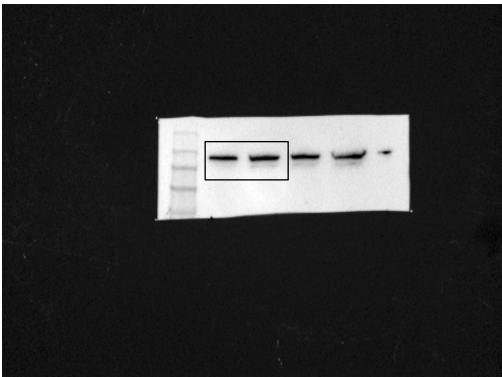

IP: O-GlcNAc

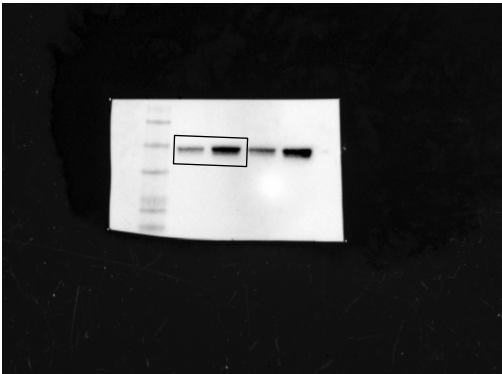

Input: DNMT1

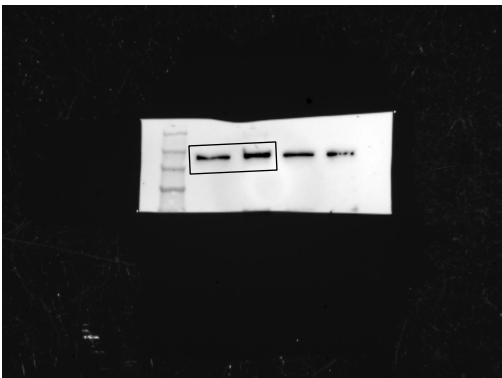

Input: O-GlcNAc

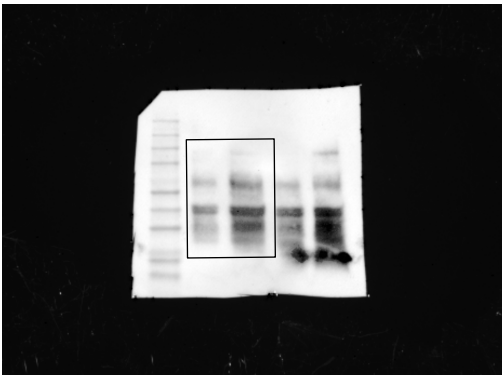

Input: GAPDH

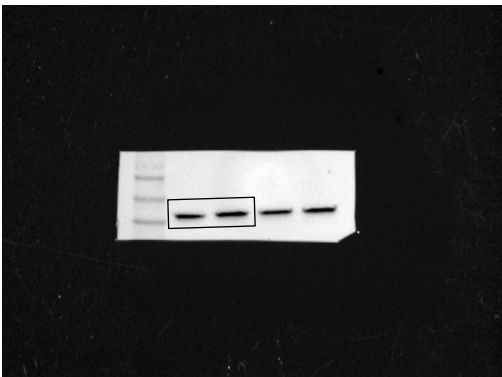

Supplement: fig1-figsupp3-data1 [file elife-85595-fig1-figsupp3-data1-v2.zip]

Figure 1—figure supplement 5

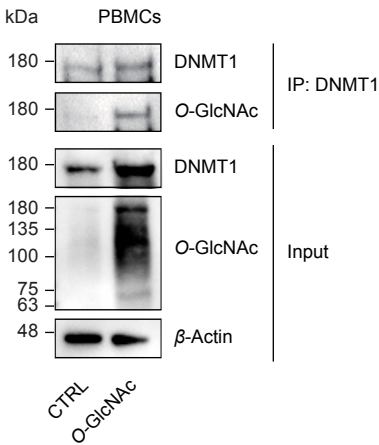

IP: DNMT1

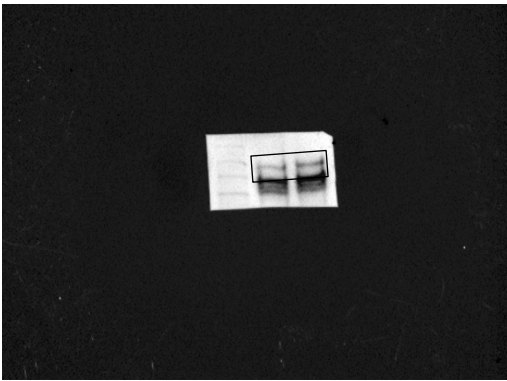

IP: O-GlcNAc

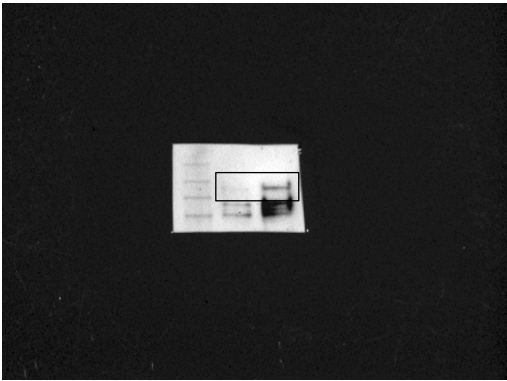

Input: DNMT1

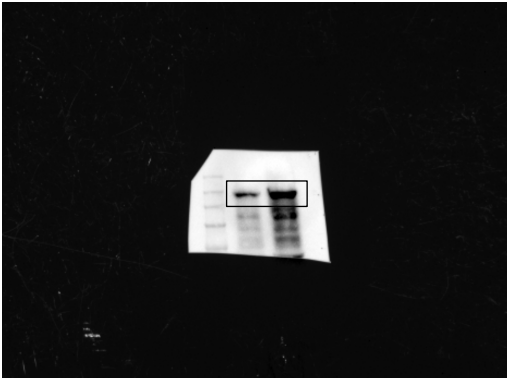

Input: O-GlcNAc

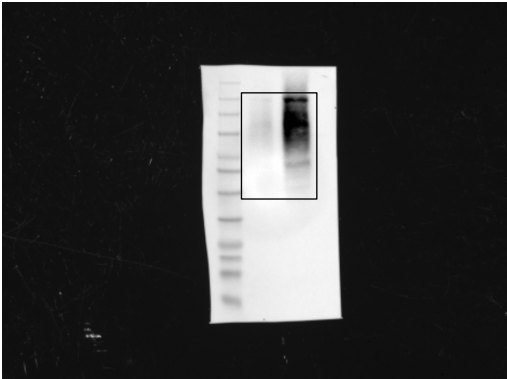

Input: GAPDH

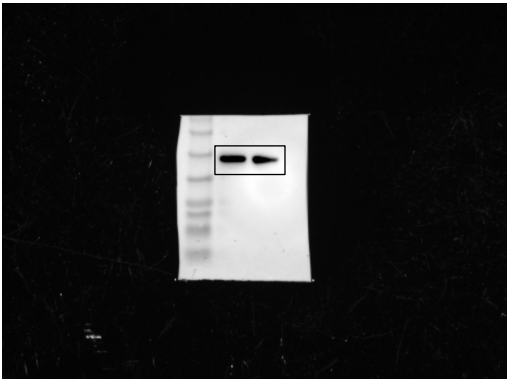

Supplement: fig1-figsupp5-data1 [file elife-85595-fig1-figsupp5-data1-v2.zip]

Figure 2D

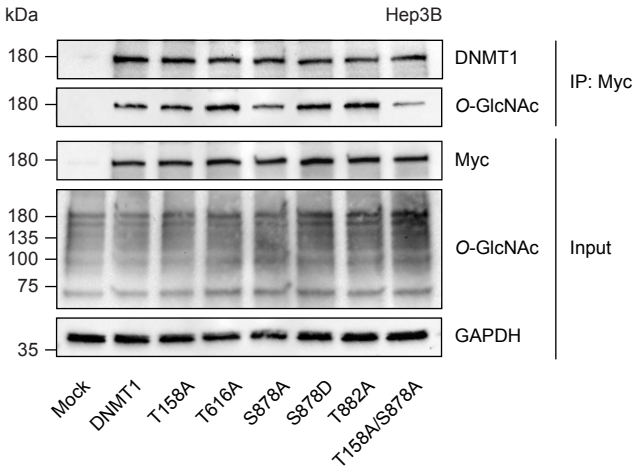

IP: DNMT1

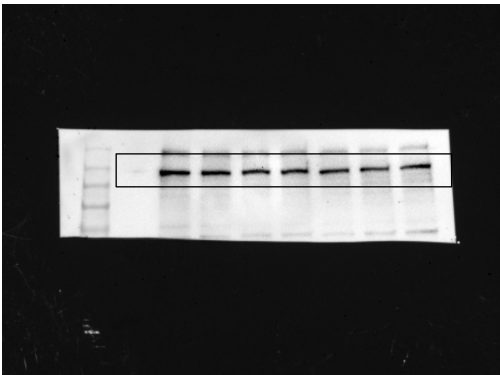

IP: O-GlcNAc

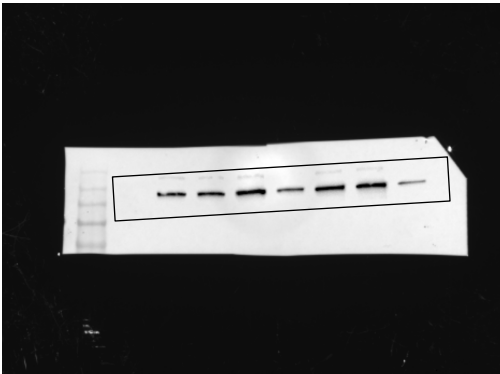

Input: Myc

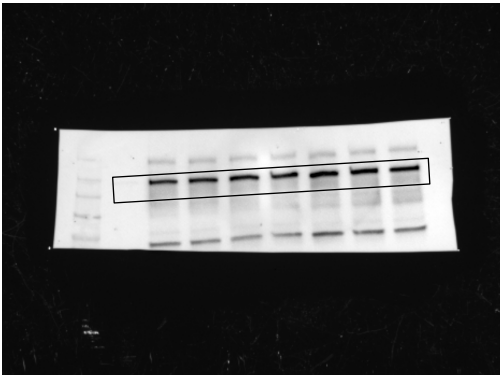

Input: O-GlcNAc

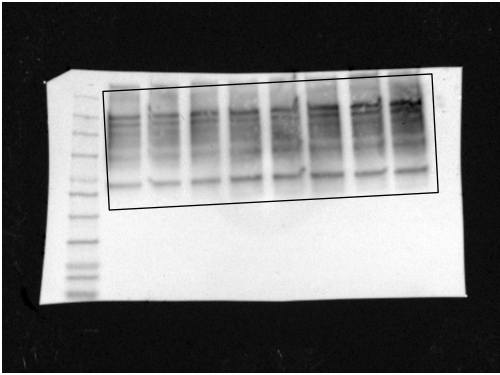

Input: GAPDH

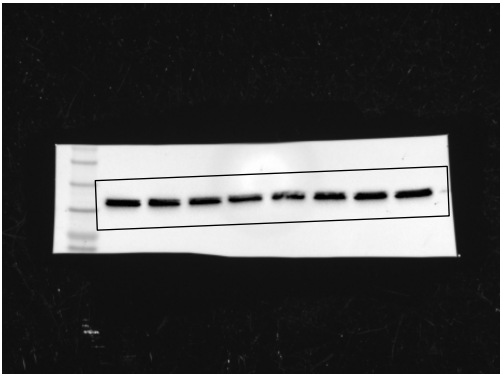

Supplement: fig2-data1 [file elife-85595-fig2-data1-v2.zip]

Figure 3—figure supplement 3B

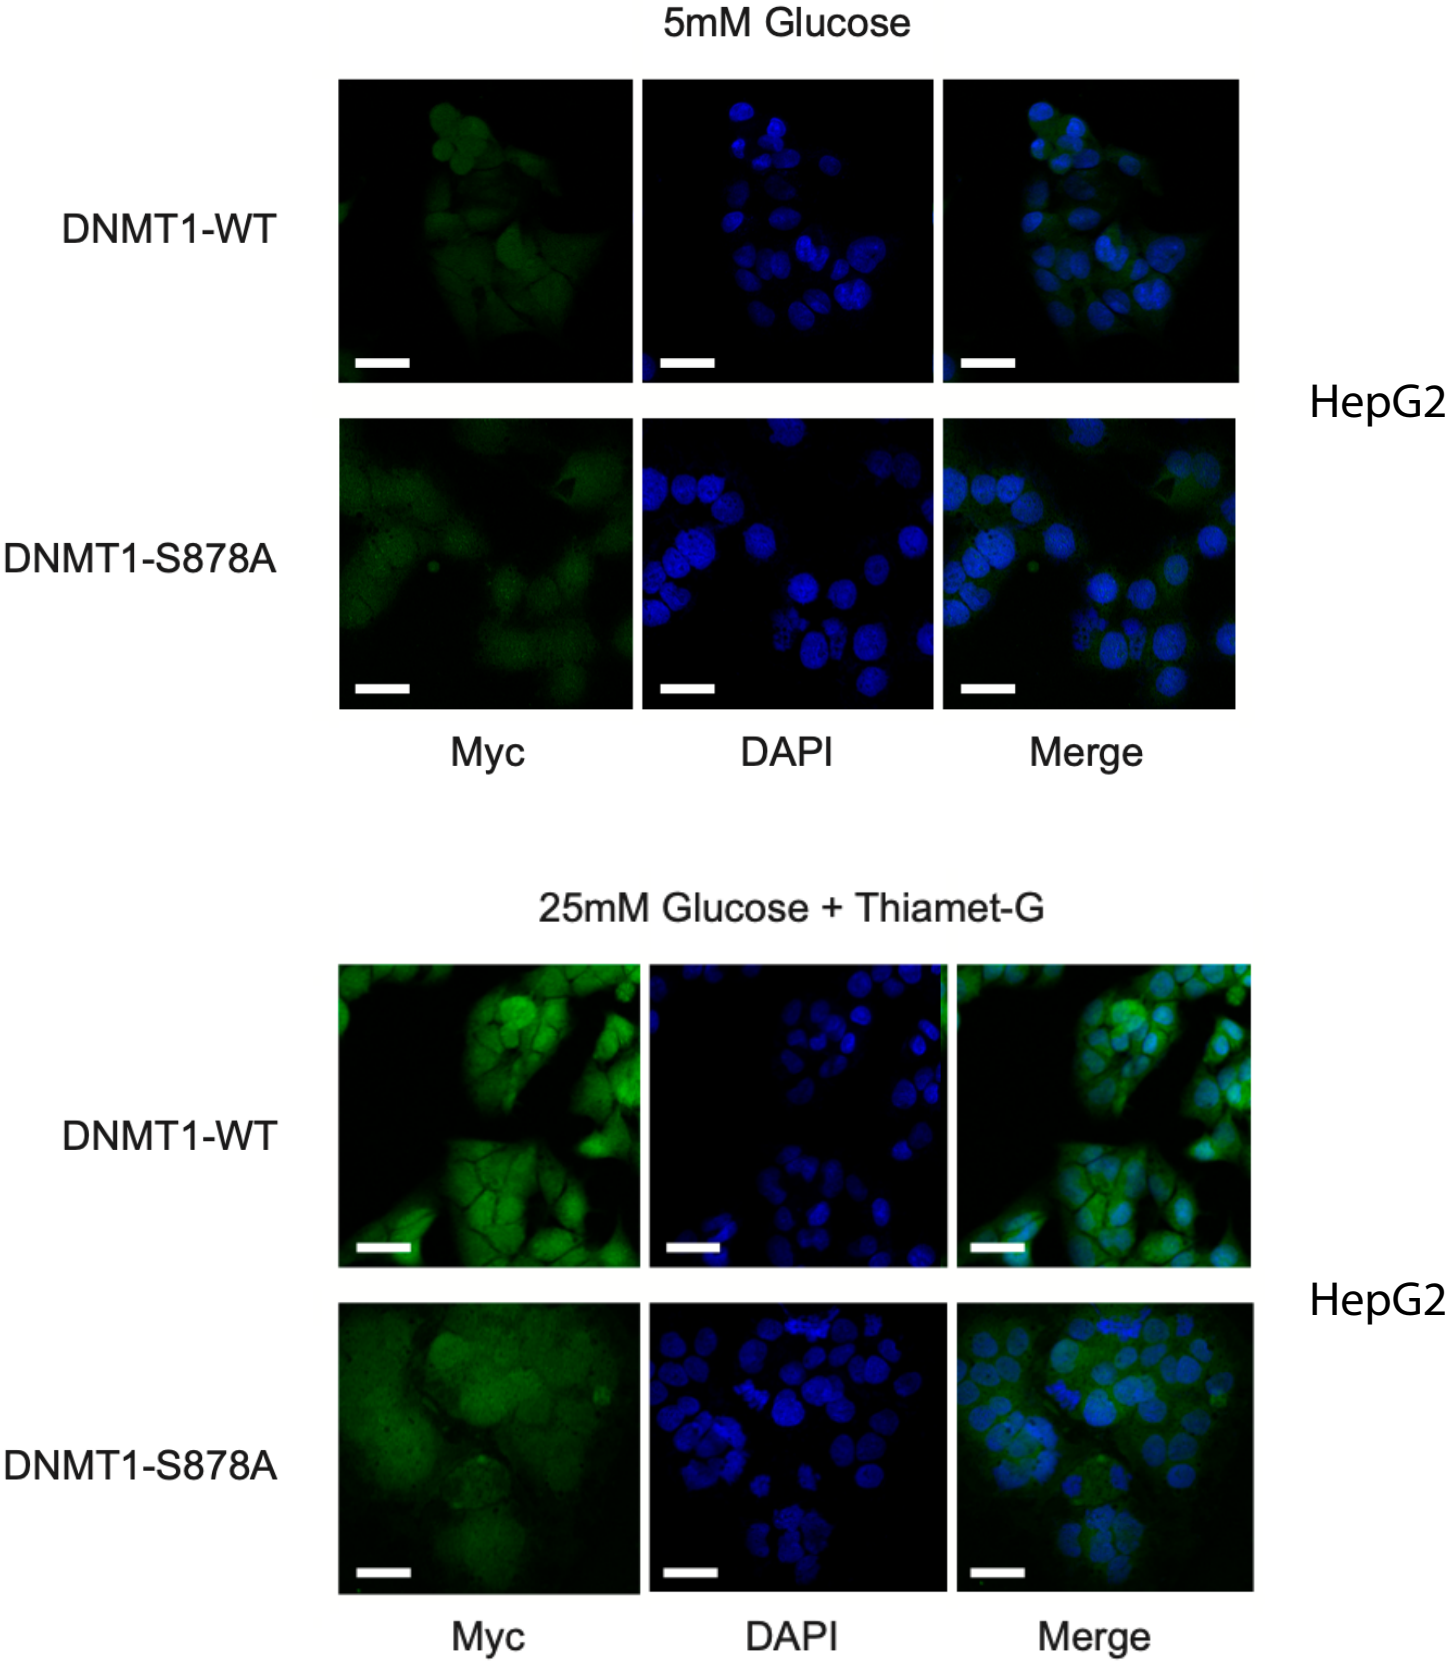

Supplement: fig3-figsupp3-data1 [file elife-85595-fig3-figsupp3-data1-v2.zip]

Figure 3—figure supplement 3A

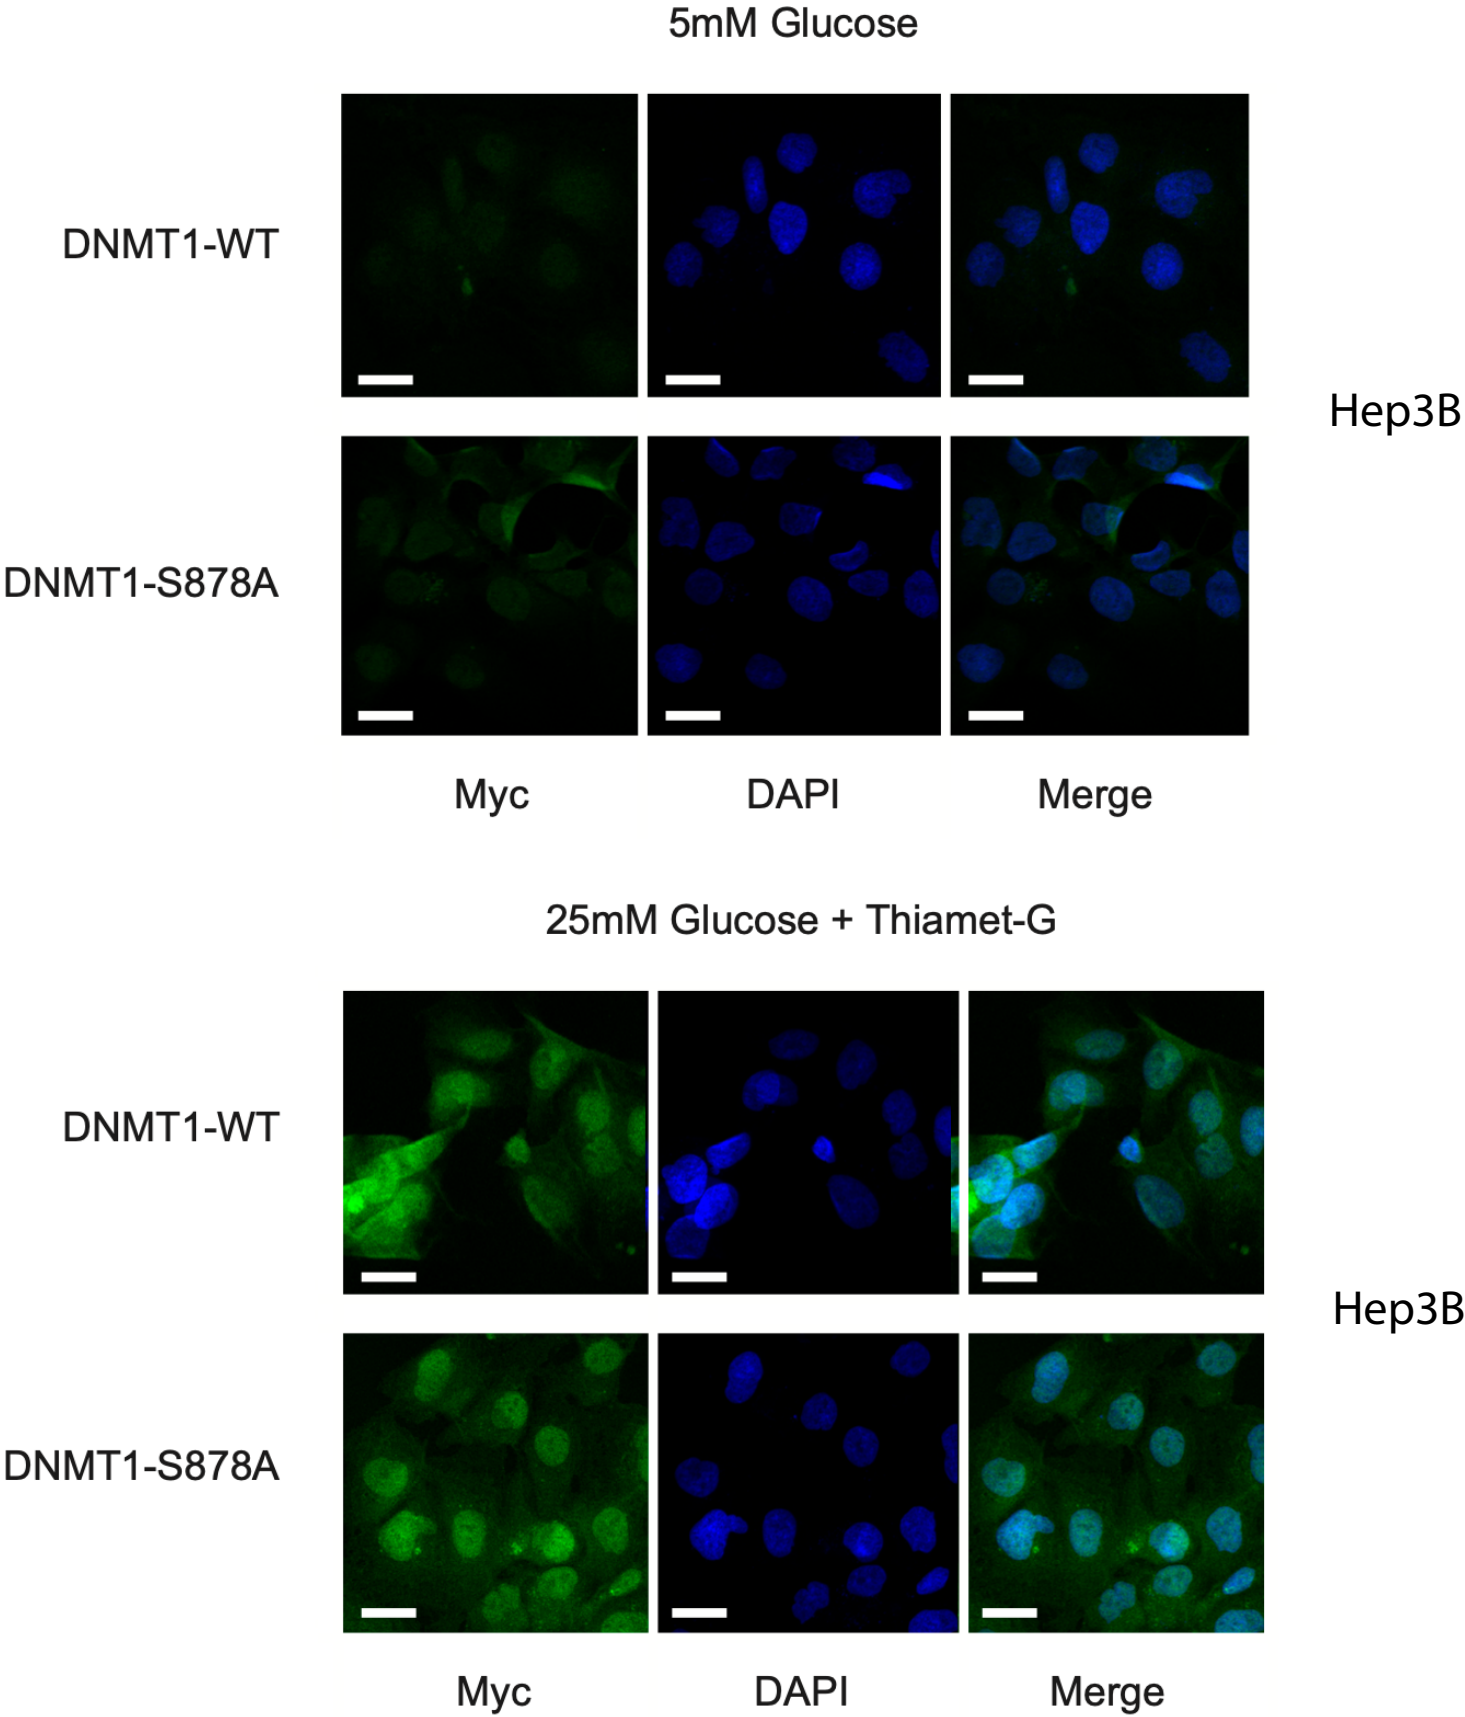

Supplement: fig3-figsupp3-data1 [file elife-85595-fig3-figsupp3-data1-v2.zip]

Figure 5A

DCFH-DA(ROS)

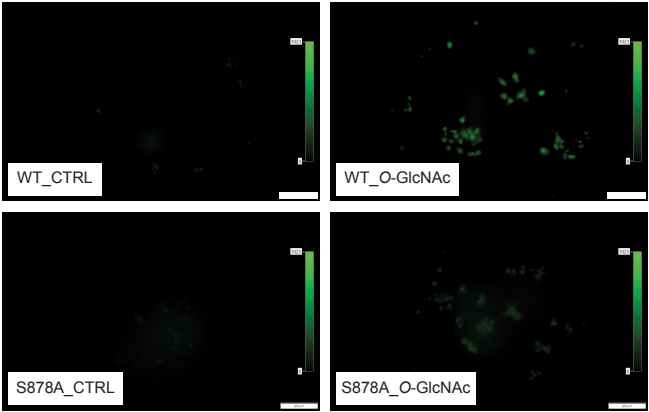

WT\_CTRL

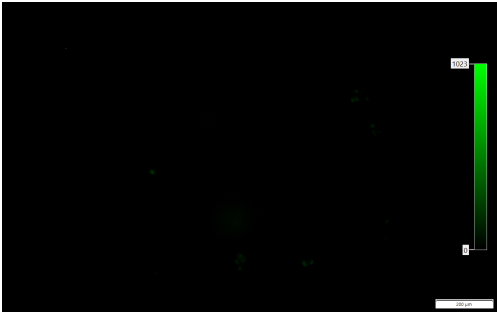

WT\_O-GlcNAc

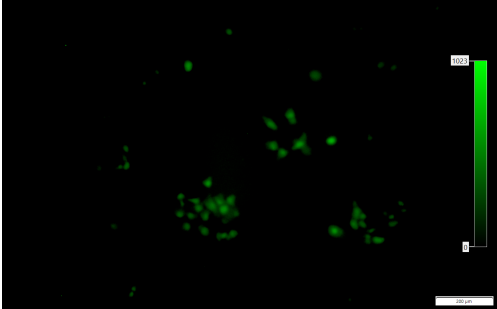

S878A\_CTRL

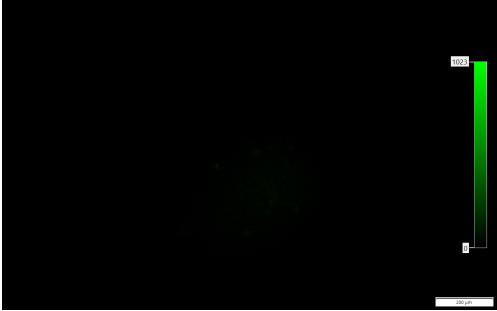

S878A\_O-GlcNAc

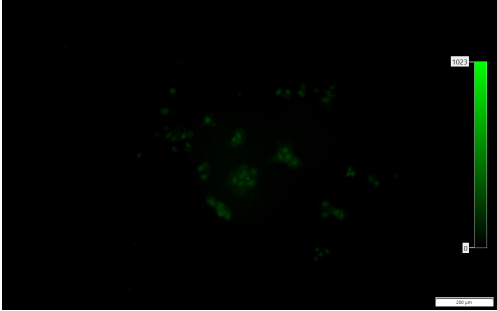

Supplement: fig5-data1 [file elife-85595-fig5-data1-v2.zip]

Figure 5C

PI Staining (Cell Death)

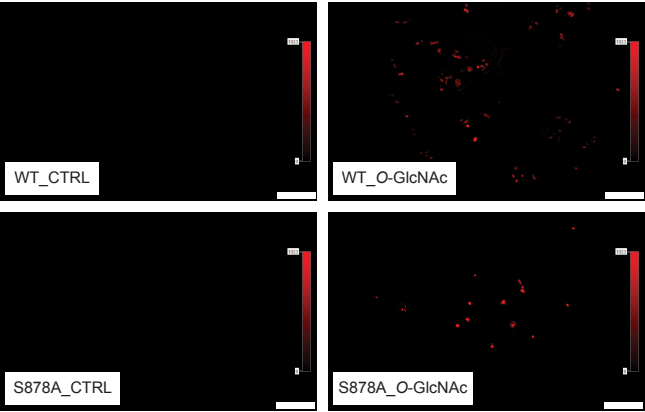

WT\_CTRL

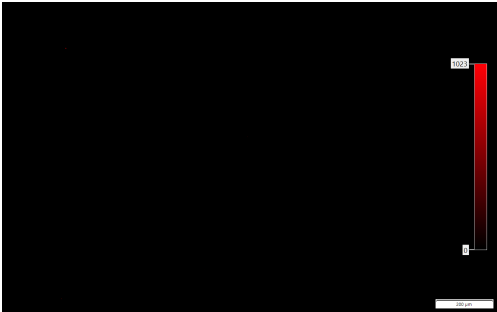

WT\_O-GlcNAc

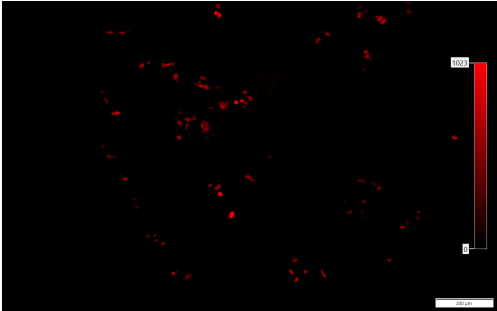

S878A\_CTRL

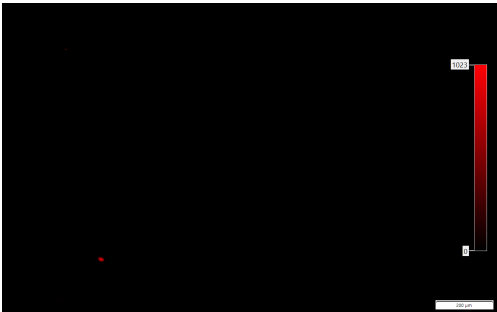

S878A\_O-GlcNAc

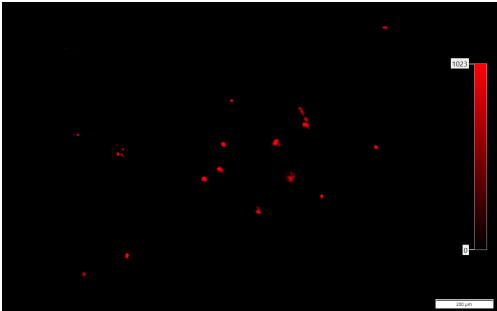

Supplement: fig5-data1 [file elife-85595-fig5-data1-v2.zip]

Figure 5—figure supplement 3

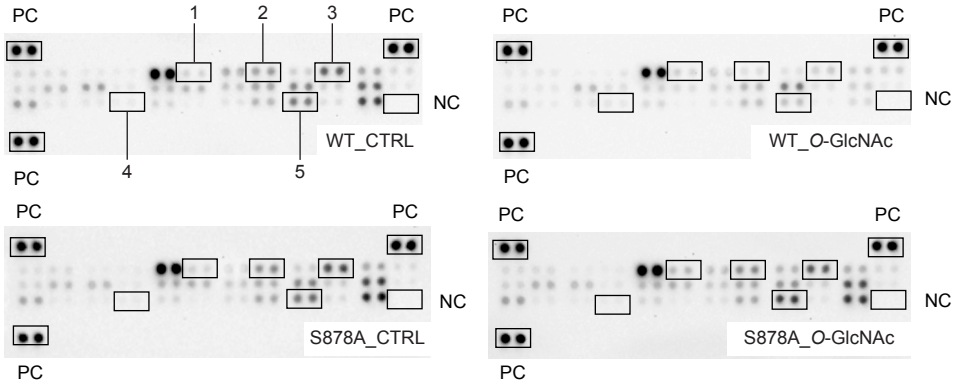

WT\_CTRL

WT\_O-GlcNAc

S878A\_CTRL

S878A\_O-GlcNAc

Supplement: fig5-figsupp3-data1 [file elife-85595-fig5-figsupp3-data1-v2.zip]
